# Supplementary material for: A novel method for interpreting survival analysis data: description and test on three major clinical trials on cardiovascular prevention
Source: PubMed Central journal article supplement (PMC7318394; doi:10.1186/s13063-020-04511-y), 2020-06-26

UKPDS-34 AnyD

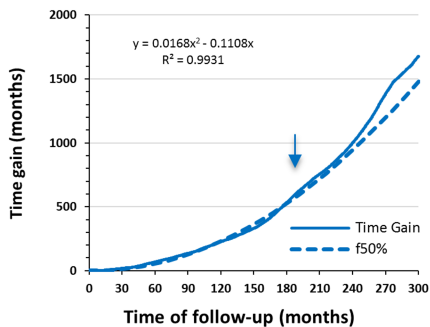

STENO-2 CV events

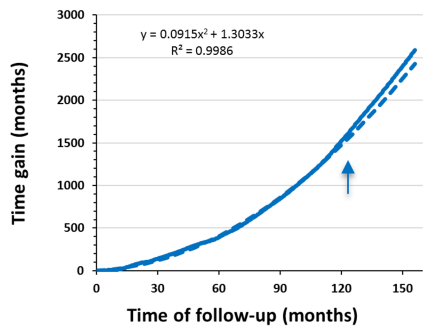

c) CIBIS II AnyD

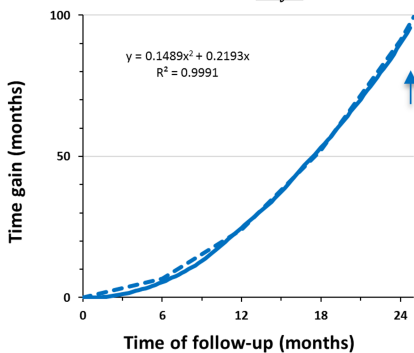

d) EMPA-REG OUTCOME CV Death

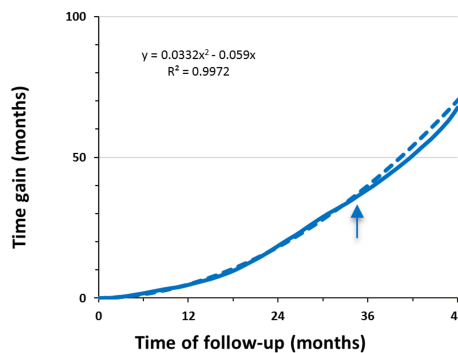

e) EMPA-REG OUTCOME Heart Failure

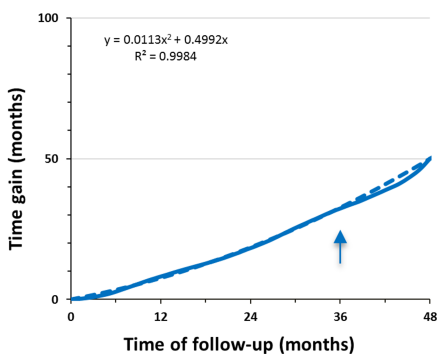

f) CANVAS AnyD

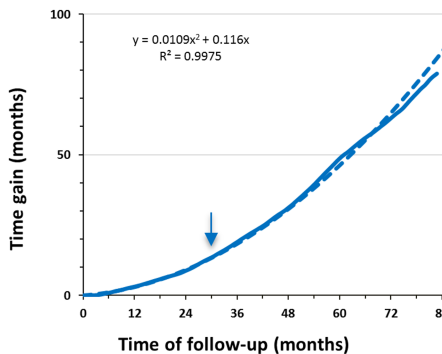

g) LEADER 3p-MACE

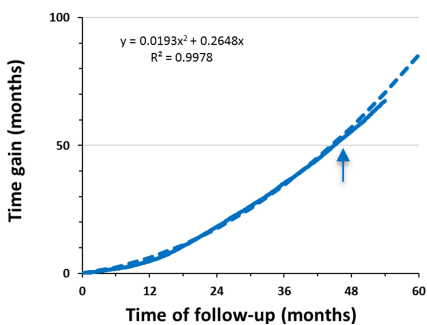

h) SUSTAIN-6 3p-MACE

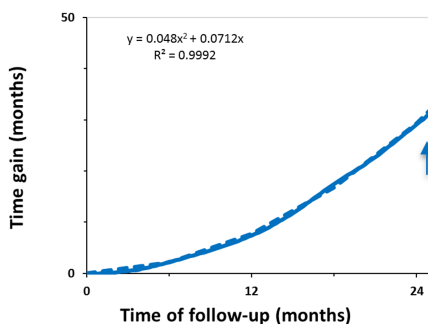

Supplement: 13063_2020_4511_MOESM3_ESM.pdf [file 13063_2020_4511_MOESM3_ESM.pdf]
