# Supplementary material for: A novel method for interpreting survival analysis data: description and test on three major clinical trials on cardiovascular prevention
Source: Springer Nature journal article supplement (doi:10.1186/s13063-020-04511-y), 2020-06-26

# PROVE-IT

4p-Mace\*

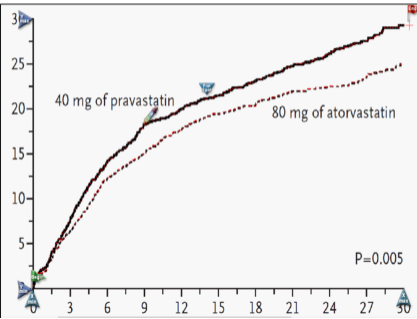

# LIFE

3p-Mace

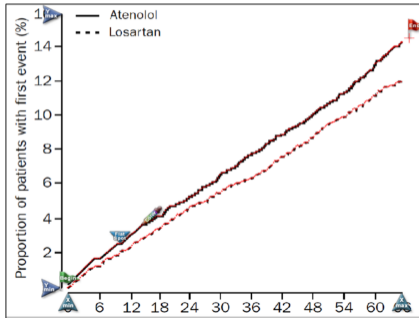

# HOPE

3p-Mace

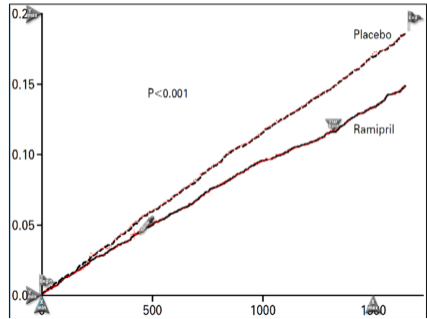

Supplement: MOESM1 [file 18123420]
