# Supplementary material for: A novel method for interpreting survival analysis data: description and test on three major clinical trials on cardiovascular prevention
Source: Springer Nature journal article supplement (doi:10.1186/s13063-020-04511-y), 2020-06-26
Supplement: MOESM2 [file 18123420]

## Glossary

| Name                         | Description                                                                                                                                                                                                                                                                              | $f(x)$                                                                                                                                                          |
|------------------------------|------------------------------------------------------------------------------------------------------------------------------------------------------------------------------------------------------------------------------------------------------------------------------------------|-----------------------------------------------------------------------------------------------------------------------------------------------------------------|
| <b>T</b>                     | Duration (months) of the study                                                                                                                                                                                                                                                           |                                                                                                                                                                 |
| <b>iKM(t)</b>                | Inverse Kaplan-Meier curve                                                                                                                                                                                                                                                               |                                                                                                                                                                 |
| <b>KM(t)</b>                 | Kaplan-Meier curve                                                                                                                                                                                                                                                                       | $t = \{t_0, t_1, t_2, \dots, T\}$<br>$KM(t) = 100 - iKM(t)$                                                                                                     |
| <b>Time Lost</b>             | Time course of the total units of time spent by the subjects after the event has occurred during the study follow-up normalized to 100 individuals                                                                                                                                       | $\int_0^{\tau} iKM(t) dt$                                                                                                                                       |
| <b>Time Gain</b>             | Time course of the extra units of event-free time that are lived by 100 subjects in the active treatment arm (a) with respect to 100 in the control arm (c).<br>Positive values indicate a protective effect of the active treatment whereas negative values represent a harmful effect. | $\int_0^{\tau} iKM_c(t) - iKM_a(t) dt$                                                                                                                          |
| <b>t<sub>50%</sub></b>       | Time at which the population in follow-up falls below 50%.                                                                                                                                                                                                                               |                                                                                                                                                                 |
| <b>Time Gain f50%</b>        | Fitting of the Time Gain curve performed in the interval $[0; t_{50\%}]$ . The fit is a polynomial second order function, forced to pass through the origin ( $y = at^2 + bt$ )                                                                                                          | $Fit[0; t_{50\%}] \left\{ \int_0^{\tau} iKM_c(t) - iKM_a(t) dt \right\}$                                                                                        |
| <b>MoT</b>                   | Months of treatment: time course of the exposure to the treatment expressed in months and normalized to 100 subjects                                                                                                                                                                     | $\int_0^{\tau} KMa(t) dt$                                                                                                                                       |
| <b>y<sup>+</sup></b>         | Time Gain expressed in year                                                                                                                                                                                                                                                              | $\frac{\int_0^{\tau} iKM_c(t) - iKM_a(t) dt}{12}$                                                                                                               |
| <b>MoT/y<sup>+</sup></b>     | Months of treatment necessary to gain 1 year of event-free life as measured by the Time Gain curve                                                                                                                                                                                       | $\frac{\int_0^{\tau} KMa(t) dt}{\frac{\int_0^{\tau} iKM_c(t) - iKM_a(t) dt}{12}}$                                                                               |
| <b>MoT/y<sup>+</sup>f50%</b> | Months of treatment necessary to gain 1 year of event-free life as measured by the Time Gain f50% function                                                                                                                                                                               | $\frac{\int_0^{\tau} KMa(t) dt}{(Fit[0; t_{50\%}] \left\{ \int_0^{\tau} iKM_c(t) - iKM_a(t) dt \right\}) / 12}$                                                 |
| <b>t<sub>6m</sub></b>        | Time at which the <i>Time Gain Obs</i> = 6 months                                                                                                                                                                                                                                        |                                                                                                                                                                 |
| <b>eMoT/y<sup>+</sup></b>    | Estimated MoT/y <sup>+</sup> obtained through the fitting of the MoT/y <sup>+</sup> f50% curve performed in the interval $[t_{6m}; T]$ . The fit is a power function ( $y = at^b$ )                                                                                                      | $Fit[t_{6m}; T] \left\{ \frac{\int_0^{\tau} KMa(t) dt}{\frac{(Fit[0; t_{50\%}] \left\{ \int_0^{\tau} iKM_c(t) - iKM_a(t) dt \right\})}{12}} \right\}$           |
| <b>NNT</b>                   | Number needed to treat: time course of the subjects on treatment normalized to 100 subjects                                                                                                                                                                                              | $\frac{\int_0^{\tau} KMa(t) dt}{t}$                                                                                                                             |
| <b>NNT/y<sup>+</sup></b>     | Number of patients who need to be treated to gain 1 year of event-free life as measured by the Time Gain curve                                                                                                                                                                           | $\frac{\frac{\int_0^{\tau} KMa(t) dt}{t}}{\frac{\int_0^{\tau} iKM_c(t) - iKM_a(t) dt}{12}}$                                                                     |
| <b>NNT/y<sup>+</sup>f50%</b> | Number of patients who need to be treated to gain 1 year of event-free life as estimated through the Time Gain f50% function                                                                                                                                                             | $\frac{\frac{\int_0^{\tau} KMa(t) dt}{t}}{\frac{(Fit[0; t_{50\%}] \left\{ \int_0^{\tau} iKM_c(t) - iKM_a(t) dt \right\})}{12}}$                                 |
| <b>eNNT/y<sup>+</sup></b>    | Estimated NNT/y <sup>+</sup> obtained through the fitting of the NNT/y <sup>+</sup> f50% curve performed in the interval $[t_{6m}; T]$ . The fit is a power function ( $y = at^b$ )                                                                                                      | $Fit[t_{6m}; T] \left\{ \frac{\frac{\int_0^{\tau} KMa(t) dt}{t}}{\frac{(Fit[0; t_{50\%}] \left\{ \int_0^{\tau} iKM_c(t) - iKM_a(t) dt \right\})}{12}} \right\}$ |
